# Supplementary material
Source: PubMed Central journal article supplement (PMC7769003)
Supplement: NIHMS1634151-supplement-1634151_Supp_Fig1.pdf [file NIHMS1634151-supplement-1634151_Supp_Fig1.pdf]

Extended Data Fig 6a

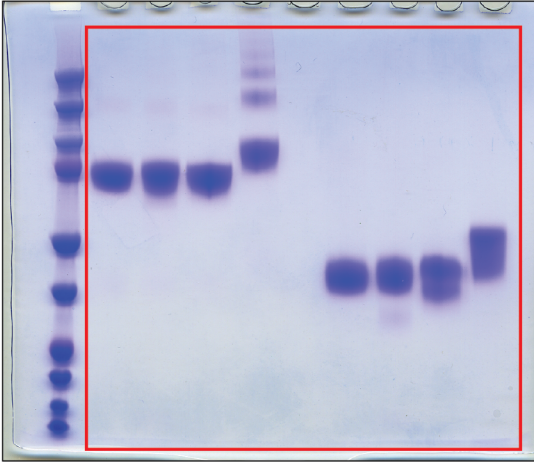

Extended Data Fig 6b

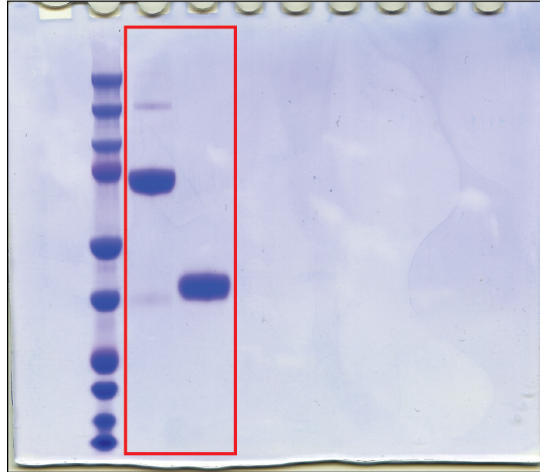

Extended Data Fig 6d

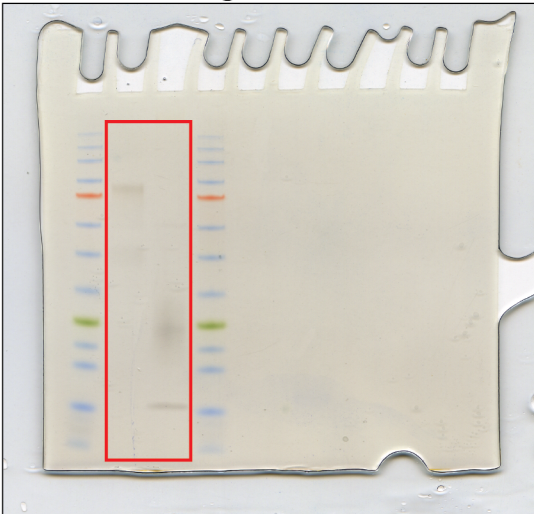

Extended Data Fig 6e

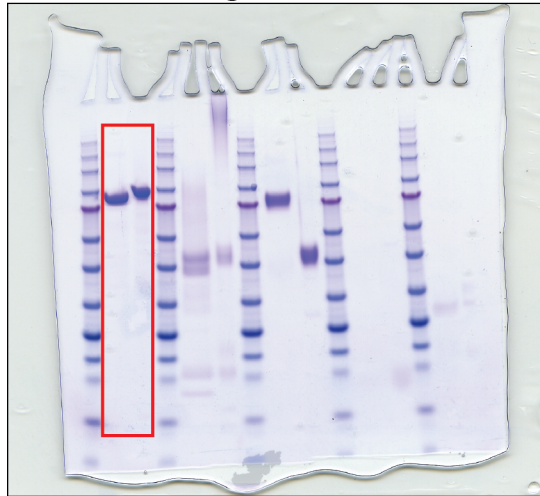

**Supplementary Figure 1. Uncropped gels for indicated Extended Data Figures. The red boxes indicate the cropped regions of gels shown in specific Figures.**
